# Supplementary material for: Elevated Serum Gastrin Is Associated with Melanoma Progression: Putative Role in Increased Migration and Invasion of Melanoma Cells
Source: MDPI journal article supplement (doi:10.3390/ijms242316851), 2023-11-28
Supplement: s1 [file s1]

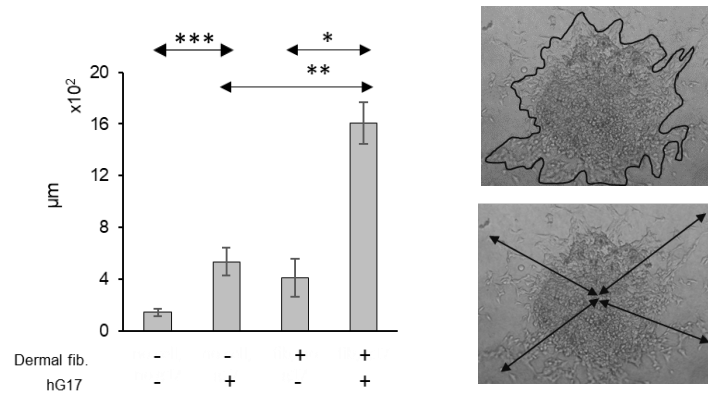

**Figure S2.** Gastrin stimulates melanoma invasion in the presence of fibroblasts. Gastrin markedly increased the distance of individual melanoma cells from spheroid centre if surrounded by stromal cells. Y-axis indicates distance of invaded tumour cells in  $\mu\text{m}$  from spheroid core.
