# Supplementary material for: Elevated Serum Gastrin Is Associated with Melanoma Progression: Putative Role in Increased Migration and Invasion of Melanoma Cells
Source: MDPI journal article supplement (doi:10.3390/ijms242316851), 2023-11-28
Supplement: s1 [file s1]

**Table S1.** Demographics of melanoma and basal cell cancer patient cohorts

|                                    | <b>Melanoma</b> | <b>Basal cell cancer</b> |
|------------------------------------|-----------------|--------------------------|
| <i>Total</i>                       | 89              | 26                       |
| <i>Male/Female</i>                 | 39/50           | 16/10                    |
| <i>Mean age [year]</i>             | 60.6±1.6        | 76.0±2.2                 |
| <i>Min/Max. age [year]</i>         | 25/89           | 54/93                    |
| <i>Acid inhibitor usage [year]</i> | 3.9±0.9         | 4.22±0.45                |
| <i>PPI/H2RA<sup>1</sup></i>        | 16/5            | 13/2                     |
| <i>Hp +ve/-ve<sup>2</sup></i>      | 37/51           | 16/10                    |

<sup>1</sup>proton pump inhibitor, histamine type 2 receptor antagonists

<sup>2</sup>Helicobacter pylori
