# Supplementary material for: Elevated Serum Gastrin Is Associated with Melanoma Progression: Putative Role in Increased Migration and Invasion of Melanoma Cells
Source: MDPI journal article supplement (doi:10.3390/ijms242316851), 2023-11-28
Supplement: s1 [file s1]

A

| No.: | Description                                                                        | Accession | Prot | Unique<br>Pep. | Pep. | Heavy/<br>Light | AAs  | MW<br>[kDa] |
|------|------------------------------------------------------------------------------------|-----------|------|----------------|------|-----------------|------|-------------|
| 1    | CD166 antigen (CD166)                                                              | Q13740    | 1    | 1              | 1    | 2.193           | 583  | 65.1        |
| 2    | Prosaposin (SAP)                                                                   | P07602    | 1    | 4              | 4    | 1.907           | 524  | 58.1        |
| 3    | 72 kDa type IV collagenase (MMP-2)                                                 | P08253    | 1    | 7              | 7    | 1.495           | 660  | 73.8        |
| 4    | Glia-derived nexin (GDN)                                                           | P07093    | 1    | 10             | 11   | 0.941           | 398  | 44          |
| 5    | Sushi repeat-containing protein SRPX<br>(SRPX)                                     | P78539    | 1    | 8              | 9    | 0.939           | 464  | 51.5        |
| 6    | Calsyntenin-1 (CSTN1)                                                              | O94985    | 2    | 15             | 16   | 0.939           | 981  | 109.7       |
| 7    | Dystroglycan (DAG1)                                                                | Q14118    | 1    | 9              | 9    | 0.863           | 895  | 97.4        |
| 8    | Fibronectin (FNC)                                                                  | P02751    | 1    | 59             | 63   | 0.863           | 2386 | 262.5       |
| 9    | Neurosecretory protein VGF (VGF)                                                   | O15240    | 1    | 14             | 15   | 0.795           | 615  | 67.2        |
| 10   | Cystatin-C (CYTC)                                                                  | P01034    | 2    | 4              | 5    | 0.782           | 146  | 15.8        |
| 11   | Protein NOV homolog (NOV)                                                          | P48745    | 1    | 10             | 13   | 0.777           | 357  | 39.1        |
| 12   | Metalloproteinase inhibitor 2 (TIMP2)                                              | P16035    | 1    | 10             | 12   | 0.705           | 220  | 24.4        |
| 13   | Insulin-like growth factor-binding protein 7<br>(IBP7)                             | Q16270    | 2    | 14             | 15   | 0.676           | 282  | 29.1        |
| 14   | Insulin-like growth factor-binding protein 2<br>(IBP2)                             | P18065    | 1    | 9              | 10   | 0.674           | 325  | 34.8        |
| 15   | Cadherin-2 (CADH2)                                                                 | P19022    | 1    | 2              | 2    | 0.655           | 906  | 99.7        |
| 16   | SPARC (SPRC)                                                                       | P09486    | 1    | 3              | 4    | 0.648           | 303  | 34.6        |
| 17   | Tumor necrosis factor-inducible gene 6 protein<br>(TSG6)                           | P98066    | 1    | 2              | 2    | 0.628           | 277  | 31.2        |
| 18   | Sulfhydryl oxidase 1 (QSOX1)                                                       | O00391    | 1    | 7              | 7    | 0.626           | 747  | 82.5        |
| 19   | Thrombospondin-1 (TSP1)                                                            | P07996    | 1    | 22             | 23   | 0.613           | 1170 | 129.3       |
| 20   | Tissue-type plasminogen activator (TPA)                                            | P00750    | 1    | 7              | 8    | 0.612           | 562  | 62.9        |
| 21   | Melanoma-derived growth regulatory protein<br>(MIA)                                | Q16674    | 1    | 3              | 3    | 0.594           | 131  | 14.5        |
| 22   | Nidogen-1 (NID1)                                                                   | P14543    | 2    | 13             | 14   | 0.559           | 1247 | 136.3       |
| 23   | Complement factor I (CFAI)                                                         | P05156    | 1    | 1              | 1    | 0.555           | 583  | 65.7        |
| 24   | Lactadherin (MFGM)                                                                 | Q08431    | 1    | 1              | 1    | 0.549           | 387  | 43.1        |
| 25   | Neuroblastoma suppressor of tumorigenicity 1<br>(NBL1)                             | P41271    | 1    | 1              | 1    | 0.527           | 181  | 19.4        |
| 26   | Insulin-like growth factor-binding protein 3<br>(IBP3)                             | P17936    | 1    | 4              | 4    | 0.501           | 291  | 31.7        |
| 27   | Follistatin-related protein 1 (FSTL1)                                              | Q12841    | 1    | 4              | 6    | 0.496           | 308  | 35          |
| 28   | Tenascin (TENA)                                                                    | P24821    | 2    | 51             | 57   | 0.462           | 2201 | 240.7       |
| 29   | Lysyl oxidase homolog 2 (LOXL2)                                                    | Q9Y4K0    | 1    | 7              | 7    | 0.461           | 774  | 86.7        |
| 30   | Granulocyte-macrophage colony-stimulating<br>factor receptor subunit alpha (CSF2R) | P15509    | 1    | 2              | 2    | 0.454           | 400  | 46.2        |
| 31   | Disintegrin and metalloproteinase domain-<br>containing protein 9 (ADAM9)          | Q13443    | 1    | 3              | 3    | 0.452           | 819  | 90.5        |
| 32   | Tumor necrosis factor receptor superfamily<br>member 12A (TNFR12)                  | Q9NP84    | 1    | 1              | 1    | 0.381           | 129  | 13.9        |
| 33   | Peptidyl-glycine alpha-amidating<br>monooxygenase (AMD)                            | P19021    | 1    | 3              | 3    | 0.376           | 973  | 108.3       |
| 34   | Galectin-3-binding protein (LG3BP)                                                 | Q08380    | 1    | 9              | 10   | 0.366           | 585  | 65.3        |
| 35   | Laminin subunit alpha-4 (LAMA4)                                                    | Q16363    | 1    | 21             | 25   | 0.361           | 1823 | 202.4       |
| 36   | Protein disulfide-isomerase A4 (PDIA4)                                             | P13667    | 5    | 14             | 16   | 0.337           | 645  | 72.9        |
| 37   | Collagen alpha-1(XII) chain (COCA1)                                                | Q99715    | 1    | 34             | 34   | 0.324           | 3063 | 332.9       |
| 38   | Matrilin-2 (MATN2)                                                                 | O00339    | 1    | 10             | 14   | 0.318           | 956  | 106.8       |
| 39   | Extracellular matrix protein 1 (ECM1)                                              | Q16610    | 1    | 7              | 7    | 0.273           | 540  | 60.6        |
| 40   | Cathepsin L1 (CATL1)                                                               | P07711    | 1    | 3              | 3    | 0.271           | 333  | 37.5        |
| 41   | Apolipoprotein D (APOD)                                                            | P05090    | 1    | 3              | 3    | 0.245           | 189  | 21.3        |
| 42   | Serine protease 23 (PR523)                                                         | O95084    | 1    | 2              | 3    | 0.221           | 383  | 43          |
| 43   | Beta-2-microglobulin (B2MG)                                                        | P61769    | 1    | 2              | 3    | 0.218           | 119  | 13.7        |
| 44   | Laminin subunit gamma-1 (LAMC1)                                                    | P11047    | 1    | 30             | 34   | 0.198           | 1609 | 177.5       |
| 45   | Matrix metalloproteinase-14 (MMP14)                                                | P50281    | 1    | 1              | 1    | 0.191           | 582  | 65.9        |
| 46   | Protein disulfide-isomerase A3 (PDIA3)                                             | P30101    | 1    | 20             | 20   | 0.19            | 505  | 56.7        |
| 47   | Protein disulfide-isomerase (PDIA1)                                                | P07237    | 1    | 6              | 7    | 0.175           | 508  | 57.1        |
| 48   | Disintegrin and metalloproteinase domain-<br>containing protein 10 (ADA10)         | O14672    | 1    | 4              | 4    | 0.173           | 748  | 84.1        |

|    |                                                           |        |    |    |    |       |      |       |
|----|-----------------------------------------------------------|--------|----|----|----|-------|------|-------|
| 49 | Laminin subunit beta-1 (LAMB1)                            | P07942 | 1  | 19 | 19 | 0.15  | 1786 | 197.9 |
| 50 | Cathepsin D (CATD)                                        | P07339 | 1  | 2  | 2  | 0.15  | 412  | 44.5  |
| 51 | Vascular endothelial growth factor receptor 1 (VGFR1)     | P17948 | 1  | 5  | 5  | 0.142 | 1338 | 150.7 |
| 52 | Trans-Golgi network integral membrane protein 2 (TGON2)   | O43493 | 1  | 5  | 5  | 0.115 | 480  | 51.1  |
| 53 | LDLR chaperone MESD (MESD)                                | Q14696 | 1  | 4  | 5  | 0.112 | 234  | 26.1  |
| 54 | Connective tissue growth factor (CTGF)                    | P29279 | 1  | 26 | 26 | 0.112 | 349  | 38.1  |
| 55 | Multiple inositol polyphosphate phosphatase 1 (MINP1)     | Q9UNW1 | 1  | 1  | 1  | 0.084 | 487  | 55    |
| 56 | Collagen triple helix repeat-containing protein 1 (CTHR1) | Q96CG8 | 1  | 5  | 6  | 0.079 | 243  | 26.2  |
| 57 | Nucleobindin-1 (NUCB1)                                    | Q02818 | 2  | 12 | 15 | 0.054 | 461  | 53.8  |
| 58 | Granulins (GRN)                                           | P28799 | 1  | 5  | 8  | 0.054 | 593  | 63.5  |
| 59 | Calumenin (CALU)                                          | O43852 | 1  | 4  | 4  | 0.053 | 315  | 37.1  |
| 60 | Growth-regulated alpha protein (GROA)                     | P09341 | 17 | 3  | 6  | 0.044 | 107  | 11.3  |
| 61 | 45 kDa calcium-binding protein (CAB45)                    | Q9BRK5 | 1  | 10 | 10 | 0.037 | 362  | 41.8  |
| 62 | Calreticulin (CALR)                                       | P27797 | 1  | 1  | 1  | 0.029 | 417  | 48.1  |
| 63 | Cell surface glycoprotein MUC18 (MUC18)                   | P43121 | 5  | 12 | 13 | 0.029 | 646  | 71.6  |
| 64 | Glucosidase 2 subunit beta (GLU2B)                        | P14314 | 1  | 12 | 13 | 0.014 | 528  | 59.4  |
| 65 | Interleukin-8 (IL8)                                       | P10145 | 1  | 4  | 5  | 0.012 | 99   | 11.1  |

## B

| No.: | Description                                                                | Accession | Prot. | Unique<br>Pep. | Pep. | Heavy/<br>Light | AAs  | MW<br>[kDa] |
|------|----------------------------------------------------------------------------|-----------|-------|----------------|------|-----------------|------|-------------|
| 1    | <i>Prosaposin (SAP)</i>                                                    | P07602    | 1     | 7              | 8    | 1.785           | 524  | 58.1        |
| 2    | <i>Neurosecretory protein VGF (VGF)</i>                                    | O15240    | 1     | 34             | 34   | 0.933           | 615  | 67.2        |
| 3    | <i>Glia-derived nexin (GDN)</i>                                            | P07093    | 1     | 4              | 4    | 0.917           | 398  | 44          |
| 4    | <i>72 kDa type IV collagenase (MMP-2)</i>                                  | P08253    | 1     | 17             | 17   | 0.9             | 660  | 73.8        |
| 5    | <i>Metalloproteinase inhibitor 1 (TIMP1)</i>                               | P01033    | 1     | 5              | 5    | 0.87            | 207  | 23.2        |
| 6    | <i>Granulins (GRN)</i>                                                     | P28799    | 1     | 15             | 16   | 0.839           | 593  | 63.5        |
| 7    | <i>Dystroglycan (DAG1)</i>                                                 | Q14118    | 1     | 12             | 12   | 0.811           | 895  | 97.4        |
| 8    | <i>Sushi repeat-containing protein SRPX<br/>(SRPX)</i>                     | P78539    | 1     | 9              | 9    | 0.791           | 464  | 51.5        |
| 9    | <i>Calsyntenin-1 (CSTN1)</i>                                               | O94985    | 2     | 17             | 18   | 0.771           | 981  | 109.7       |
| 10   | <i>Insulin-like growth factor-binding protein 2<br/>(IBP2)</i>             | P18065    | 1     | 15             | 16   | 0.761           | 325  | 34.8        |
| 11   | <i>Stanniocalcin-1 (STC1)</i>                                              | P52823    | 1     | 2              | 2    | 0.734           | 247  | 27.6        |
| 12   | <i>Metalloproteinase inhibitor 2 (TIMP2)</i>                               | P16035    | 1     | 14             | 16   | 0.7             | 220  | 24.4        |
| 13   | <i>Insulin-like growth factor-binding protein 3<br/>(IBP3)</i>             | P17936    | 20    | 13             | 13   | 0.695           | 291  | 31.7        |
| 14   | <i>Fibronectin (FNC)</i>                                                   | P02751    | 3     | 78             | 78   | 0.683           | 2386 | 262.5       |
| 15   | <i>Cadherin-2 (CADH2)</i>                                                  | P19022    | 1     | 1              | 1    | 0.675           | 906  | 99.7        |
| 16   | <i>Sulfhydryl oxidase 1 (QSOX1)</i>                                        | O00391    | 1     | 5              | 5    | 0.661           | 747  | 82.5        |
| 17   | <i>ADM (ADML)</i>                                                          | P35318    | 1     | 5              | 6    | 0.647           | 185  | 20.4        |
| 18   | <i>Cathepsin L2 (CATL2)</i>                                                | O60911    | 2     | 1              | 3    | 0.638           | 334  | 37.3        |
| 19   | <i>Cadherin-1 (CADH1)</i>                                                  | P12830    | 1     | 1              | 1    | 0.628           | 882  | 97.4        |
| 20   | <i>Protein NOV homolog (NOV)</i>                                           | P48745    | 1     | 12             | 13   | 0.619           | 357  | 39.1        |
| 21   | <i>Cystatin-C (CYTC)</i>                                                   | P01034    | 2     | 6              | 6    | 0.608           | 146  | 15.8        |
| 22   | <i>Melanoma-derived growth regulatory<br/>protein (MIA)</i>                | Q16674    | 1     | 5              | 5    | 0.606           | 131  | 14.5        |
| 23   | <i>Testican-1 (TICN1)</i>                                                  | Q08629    | 2     | 8              | 9    | 0.599           | 439  | 49.1        |
| 24   | <i>Follistatin-related protein 5 (FSTL5)</i>                               | Q8N475    | 2     | 3              | 3    | 0.585           | 847  | 95.7        |
| 25   | <i>SPARC (SPRC)</i>                                                        | P09486    | 1     | 5              | 6    | 0.572           | 303  | 34.6        |
| 26   | <i>Cell migration-inducing and hyaluronan-<br/>binding protein (CEMIP)</i> | Q8WUJ3    | 1     | 7              | 9    | 0.553           | 1361 | 152.9       |
| 27   | <i>Tenascin (TENA)</i>                                                     | P24821    | 2     | 24             | 27   | 0.544           | 2201 | 240.7       |
| 28   | <i>Amyloid beta A4 protein (A4)</i>                                        | P05067    | 2     | 11             | 12   | 0.534           | 770  | 86.9        |
| 29   | <i>Insulin-like growth factor-binding protein 7<br/>(IBP7)</i>             | Q16270    | 1     | 12             | 12   | 0.532           | 282  | 29.1        |
| 30   | <i>Peptidyl-glycine alpha-amidating<br/>monooxygenase (AMD)</i>            | P19021    | 1     | 10             | 11   | 0.528           | 973  | 108.3       |
| 31   | <i>Tissue-type plasminogen activator (TPA)</i>                             | P00750    | 1     | 10             | 11   | 0.514           | 562  | 62.9        |
| 32   | <i>Inter-alpha-trypsin inhibitor heavy chain H5<br/>(ITIH5)</i>            | Q86UX2    | 1     | 9              | 10   | 0.502           | 942  | 104.5       |
| 33   | <i>Neuroblastoma suppressor of tumorigenicity<br/>1 (NBL1)</i>             | P41271    | 1     | 3              | 3    | 0.499           | 181  | 19.4        |
| 34   | <i>Collagen alpha-3(V) chain (CO5A3)</i>                                   | P25940    | 1     | 2              | 3    | 0.489           | 1745 | 172         |
| 35   | <i>Laminin subunit alpha-1 (LAMA1)</i>                                     | P25391    | 2     | 48             | 51   | 0.487           | 3075 | 336.9       |
| 36   | <i>Amyloid-like protein 2 (APLP2)</i>                                      | Q06481    | 1     | 2              | 3    | 0.477           | 763  | 86.9        |
| 37   | <i>Follistatin-related protein 1 (FSTL1)</i>                               | Q12841    | 1     | 8              | 9    | 0.468           | 308  | 35          |
| 38   | <i>Serine protease 23 (PRS23)</i>                                          | O95084    | 1     | 3              | 4    | 0.467           | 383  | 43          |
| 39   | <i>EMILIN-2 (EMIL2)</i>                                                    | Q9BXX0    | 1     | 6              | 8    | 0.445           | 1053 | 115.6       |
| 40   | <i>Transmembrane glycoprotein NMB<br/>(GPNMB)</i>                          | Q14956    | 1     | 3              | 4    | 0.426           | 572  | 63.9        |
| 41   | <i>Serine protease HTRA1 (HTRA1)</i>                                       | Q92743    | 1     | 12             | 13   | 0.425           | 480  | 51.3        |
| 42   | <i>Tartrate-resistant acid phosphatase type 5<br/>(PPA5)</i>               | P13686    | 1     | 2              | 2    | 0.391           | 325  | 36.6        |
| 43   | <i>Apolipoprotein D (APOD)</i>                                             | P05090    | 1     | 4              | 5    | 0.39            | 189  | 21.3        |
| 44   | <i>Lactadherin (MFGM)</i>                                                  | Q08431    | 1     | 1              | 1    | 0.37            | 387  | 43.1        |
| 45   | <i>Vitamin K-dependent protein S (PROS)</i>                                | P07225    | 1     | 5              | 5    | 0.353           | 676  | 75.1        |
| 46   | <i>Extracellular matrix protein 1 (ECM1)</i>                               | Q16610    | 1     | 16             | 16   | 0.351           | 540  | 60.6        |
| 47   | <i>Laminin subunit gamma-1 (LAMC1)</i>                                     | P11047    | 1     | 43             | 46   | 0.343           | 1609 | 177.5       |

|    |                                                                        |        |    |    |    |       |      |       |
|----|------------------------------------------------------------------------|--------|----|----|----|-------|------|-------|
| 48 | Angiopoietin-related protein 2 (ANGL2)                                 | Q9UKU9 | 2  | 5  | 5  | 0.341 | 493  | 57.1  |
| 49 | Matrix metalloproteinase-14 (MMP14)                                    | P50281 | 1  | 6  | 6  | 0.341 | 582  | 65.9  |
| 50 | Cathepsin D (CATD)                                                     | P07339 | 1  | 7  | 8  | 0.313 | 412  | 44.5  |
| 51 | Acid ceramidase (ASAH1)                                                | Q13510 | 1  | 4  | 4  | 0.309 | 395  | 44.6  |
| 52 | Galectin-3-binding protein (LG3BP)                                     | Q08380 | 1  | 7  | 8  | 0.307 | 585  | 65.3  |
| 53 | Collagen alpha-1(VI) chain (CO6A1)                                     | P12109 | 1  | 1  | 1  | 0.262 | 1028 | 108.5 |
| 54 | Thrombospondin-1 (TSP1)                                                | P07996 | 1  | 11 | 11 | 0.258 | 1170 | 129.3 |
| 55 | Cathepsin L1 (CATL1)                                                   | P07711 | 2  | 9  | 11 | 0.228 | 333  | 37.5  |
| 56 | Laminin subunit alpha-4 (LAMA4)                                        | Q16363 | 1  | 6  | 9  | 0.221 | 1823 | 202.4 |
| 57 | Growth-regulated alpha protein (GROA)                                  | P09341 | 19 | 5  | 6  | 0.221 | 107  | 11.3  |
| 58 | Laminin subunit beta-1 (LAMB1)                                         | P07942 | 3  | 26 | 29 | 0.213 | 1786 | 197.9 |
| 59 | Immunoglobulin superfamily member 8 (IGSF8)                            | Q969P0 | 1  | 8  | 8  | 0.198 | 613  | 65    |
| 60 | Beta-2-microglobulin (B2MG)                                            | P61769 | 1  | 2  | 2  | 0.197 | 119  | 13.7  |
| 61 | Protein jagged-1 (JAG1)                                                | P78504 | 1  | 3  | 3  | 0.193 | 1218 | 133.7 |
| 62 | Collagen alpha-2(IV) chain (CO4A2)                                     | P08572 | 1  | 13 | 13 | 0.173 | 1712 | 167.4 |
| 63 | Growth/differentiation factor 15 (GDF15)                               | Q99988 | 1  | 13 | 14 | 0.166 | 308  | 34.1  |
| 64 | DnaJ homolog subfamily B member 11 (DJB11)                             | Q9UBS4 | 1  | 2  | 2  | 0.156 | 358  | 40.5  |
| 65 | Nucleobindin-1 (NUCB1)                                                 | Q02818 | 14 | 26 | 30 | 0.155 | 461  | 53.8  |
| 66 | Calnexin (CALX)                                                        | P27824 | 1  | 3  | 4  | 0.153 | 592  | 67.5  |
| 67 | Alpha-2-macroglobulin (A2MG)                                           | P01023 | 1  | 2  | 4  | 0.152 | 1474 | 163.2 |
| 68 | Kunitz-type protease inhibitor 1 (SPIT1)                               | O43278 | 1  | 1  | 1  | 0.15  | 529  | 58.4  |
| 69 | Receptor-type tyrosine-protein phosphatase S (PTPRS)                   | Q13332 | 1  | 10 | 11 | 0.144 | 1948 | 216.9 |
| 70 | Protein disulfide-isomerase A4 (PDIA4)                                 | P13667 | 5  | 23 | 24 | 0.141 | 645  | 72.9  |
| 71 | Disintegrin and metalloproteinase domain-containing protein 10 (ADA10) | O14672 | 1  | 9  | 9  | 0.134 | 748  | 84.1  |
| 72 | Metalloproteinase inhibitor 3 (TIMP-3)                                 | P35625 | 1  | 7  | 7  | 0.125 | 211  | 24.1  |
| 73 | Protein disulfide-isomerase A3 (PDIA3)                                 | P30101 | 1  | 21 | 22 | 0.11  | 505  | 56.7  |
| 74 | Melanocyte protein PMEL (PMEL)                                         | P40967 | 1  | 7  | 8  | 0.093 | 661  | 70.2  |
| 75 | Nucleobindin-2 (NUCB2)                                                 | P80303 | 1  | 5  | 7  | 0.091 | 420  | 50.2  |
| 76 | Golgi apparatus protein 1 (GSLG1)                                      | Q92896 | 1  | 12 | 12 | 0.091 | 1179 | 134.5 |
| 77 | Multiple inositol polyphosphate phosphatase 1 (MINP1)                  | Q9UNW1 | 1  | 1  | 1  | 0.089 | 487  | 55    |
| 78 | 78 kDa glucose-regulated protein (GRP78)                               | P11021 | 3  | 31 | 36 | 0.073 | 654  | 72.3  |
| 79 | Protein CYR61 (CYR61)                                                  | O00622 | 1  | 9  | 11 | 0.071 | 381  | 42    |
| 80 | Trans-Golgi network integral membrane protein 2 (TGON2)                | O43493 | 1  | 6  | 7  | 0.069 | 480  | 51.1  |
| 81 | 45 kDa calcium-binding protein (CAB45)                                 | Q9BRK5 | 1  | 9  | 11 | 0.067 | 362  | 41.8  |
| 82 | Cathepsin B (CATB)                                                     | P07858 | 1  | 9  | 9  | 0.06  | 339  | 37.8  |
| 83 | Chondroitin sulfate proteoglycan 4 (CSPG4)                             | Q6UVK1 | 1  | 21 | 23 | 0.055 | 2322 | 250.4 |
| 84 | Collagen triple helix repeat-containing protein 1 (CTHR1)              | Q96CG8 | 1  | 4  | 5  | 0.053 | 243  | 26.2  |
| 85 | Midkine (MK)                                                           | P21741 | 1  | 3  | 4  | 0.052 | 143  | 15.6  |
| 86 | Procollagen-lysine,2-oxoglutarate 5-dioxygenase 3 (PLOD3)              | O60568 | 1  | 9  | 13 | 0.048 | 738  | 84.7  |
| 87 | Calreticulin (CALR)                                                    | P27797 | 1  | 6  | 8  | 0.04  | 417  | 48.1  |
| 88 | Chitinase domain-containing protein 1 (CHID1)                          | Q9BWS9 | 1  | 2  | 3  | 0.035 | 393  | 44.9  |
| 89 | Neural cell adhesion molecule L1 (L1CAM)                               | P32004 | 2  | 8  | 8  | 0.031 | 1257 | 139.9 |
| 90 | Calumenin (CALU)                                                       | O43852 | 1  | 10 | 10 | 0.024 | 315  | 37.1  |
| 91 | Polypeptide N-acetylgalactosaminyltransferase 2 (GALT2)                | Q10471 | 1  | 15 | 15 | 0.023 | 571  | 64.7  |
| 92 | Cell surface glycoprotein MUC18 (MUC18)                                | P43121 | 2  | 16 | 16 | 0.02  | 646  | 71.6  |
| 93 | Glucosidase 2 subunit beta (GLU2B)                                     | P14314 | 1  | 11 | 11 | 0.011 | 528  | 59.4  |

**Table S2.** List of classically secreted isotope labelled proteins with signal peptide sequence showing alteration after gastrin treatment characterized from Skmel-2 (A) and G361 (B) secretome. Columns from left to right contain protein name, protein identification accession number based on the FASTA database, number of identified proteins in the protein group of a master protein (#prot), number of peptide sequences unique to the protein group (#unique

pep), number of distinct peptide sequences in the protein group (#pep), ratio of labelled to unlabelled proteins (#H/L), the sequence length of the protein (#AA) and the calculated molecular weight of the protein (#MW).
